# Supplementary material for: Screening of ETO2-GLIS2–induced Super Enhancers identifies targetable cooperative dependencies in acute megakaryoblastic leukemia
Source: PubMed Central journal article supplement — Sci Adv. 2022 Feb 9;8(6):eabg9455. doi: 10.1126/sciadv.abg9455 (PMC8827662; doi:10.1126/sciadv.abg9455), 2022-02-09
Supplement: sciadv.abg9455_sm.pdf [file sciadv.abg9455_sm.pdf]

Supplementary Materials for  
**Screening of ETO2-GLIS2–induced Super Enhancers identifies targetable cooperative dependencies in acute megakaryoblastic leukemia**

Salima Benbarche, Cécile K. Lopez, Eralda Salataj, Zakia Aid, Cécile Thirant, Marie-Charlotte Laiguillon, Séverine Lecourt, Yannis Belloucif, Camille Vaganay, Marion Antonini, Jiang Hu, Alexandra da Silva Babinet, Delphine Ndiaye-Lobry, Bryann Pardieu, Arnaud Petit, Alexandre Puissant, Julie Chaumeil, Thomas Mercher\*, Camille Lobry\*

\*Corresponding author. Email: [camille.lobry@inserm.fr](mailto:camille.lobry@inserm.fr) (C.L.); [thomas.mercher@inserm.fr](mailto:thomas.mercher@inserm.fr) (T.M.)

Published 9 February 2022, *Sci. Adv.* **8**, eabg9455 (2022)  
DOI: 10.1126/sciadv.abg9455

**The PDF file includes:**

Figs. S1 to S9  
Legend for table S1  
Tables S2 to S6

**Other Supplementary Material for this manuscript includes the following:**

Table S1

**Figure S1**

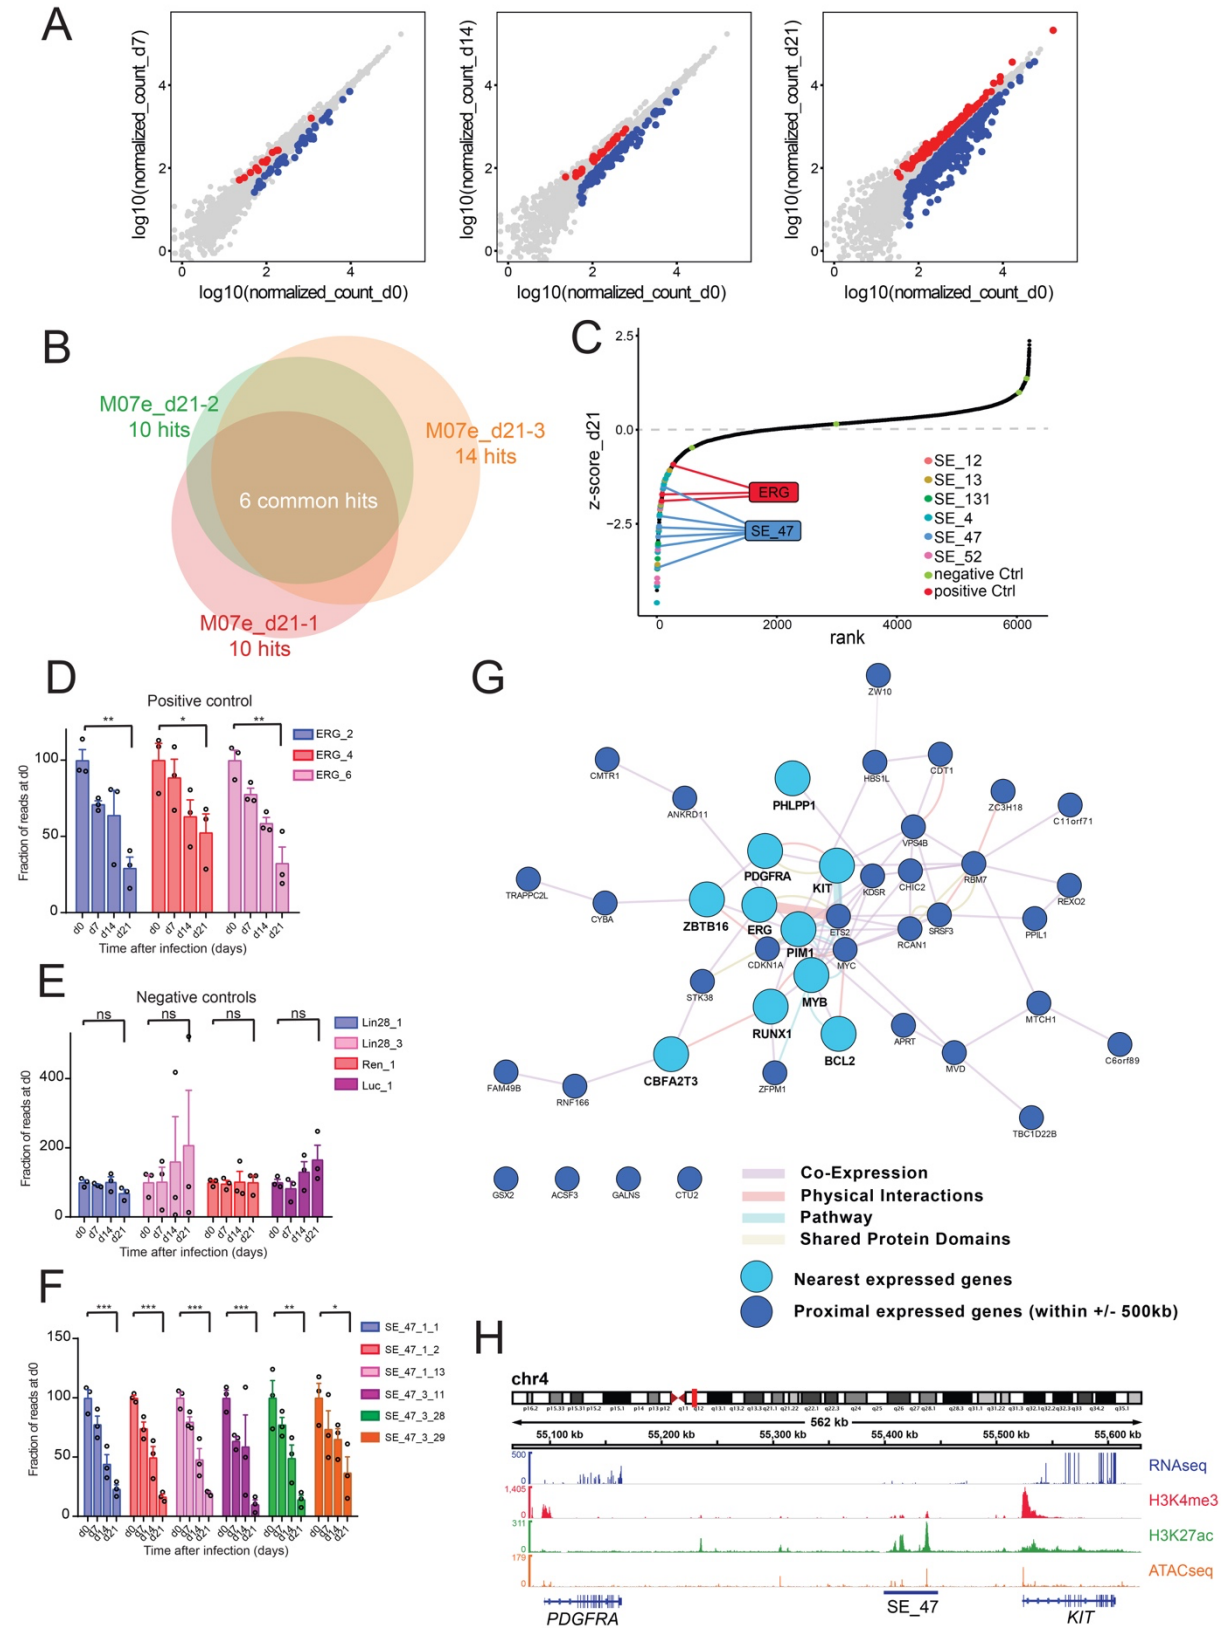

**Figure S1. CRISPRi screening of Super Enhancer in ETO2-GLIS2<sup>+</sup> AMKL cell line M07e**

**A)** Scatter plots showing significantly depleted (blue) or enriched (red) sgRNA at day 7, 14 and 21 compared to day 0. Only sgRNA with normalized read coverage over 40x at day 0 and with p-value < 0,05 are highlighted. Dots represent average of normalized read counts across the 3 replicates.

**B)** Venn Diagram showing overlap of significant (FDR < 0,25) hits between the 3 replicates of the screen as determined by maximum likelihood of enrichment.

**C)** Dot plot depicting changes in representation of the 6471 sgRNAs covered over 40x during 21 days of culture. sgRNA z-scores were calculated by subtracting to the log<sub>2</sub> fold change of average normalized counts at d21 compared to d0 (Log<sub>2</sub>FC(d21/d0)) the average of all sgRNA Log<sub>2</sub>FC(d21/d0) and dividing by the standard deviation of all Log<sub>2</sub>FC(d21/d0) and are plotted in ascending order. Positive control sgRNAs targeting ERG gene are marked in red; negative control sgRNAs are marked in green. sgRNAs against common hits and significantly depleted are colored and sgRNA against SE\_47 and ERG are highlighted.

**D)** Bargraph representing variations of normalized counts of sgRNA targeting ERG, positive control of the screen. Data are represented as ratio of counts at day 0. Data are represented as mean ± SEM, n=3, statistical significance is determined using Student's t-test, \* p<0.05, \*\* p<0.01.

**E)** Bargraph representing variations of normalized counts of sgRNA targeting Luciferase, Renilla and Lin28, negative controls of the screen. Data are represented as ratio of counts at day 0. Data are represented as mean ± SEM, n=3, statistical significance is determined using Student's t-test, ns=not significant.

**F)** Bargraph representing variations of normalized counts of sgRNA targeting SE\_47. Data are represented as ratio of counts at day 0. Data are represented as mean ± SEM, statistical significance is determined using Student's t-test, \* p<0.05, \*\* p<0.01, \*\*\* p<0.001

**G)** Network of nearest expressed genes and proximal expressed genes of top hits Super Enhancer identified through CRISPRi screening. Co-Expression, Physical interactions, common pathway interactions and shared protein domains were included in the network.

**H)** Gene track of SE\_47 locus on chromosome 4, including proximal genes *KIT* and *PDGFRA*, showing normalized read density histograms of H3K4me3 ChIP-seq, H3K27ac ChIP-seq and ATAC-seq (bottom panel) in M07e cells. Read densities are shown as unique reads per million.

Figure S2

A

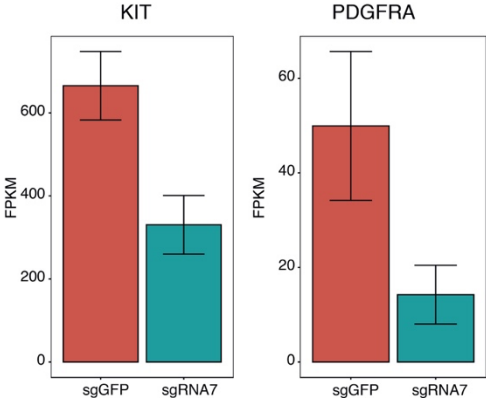

B

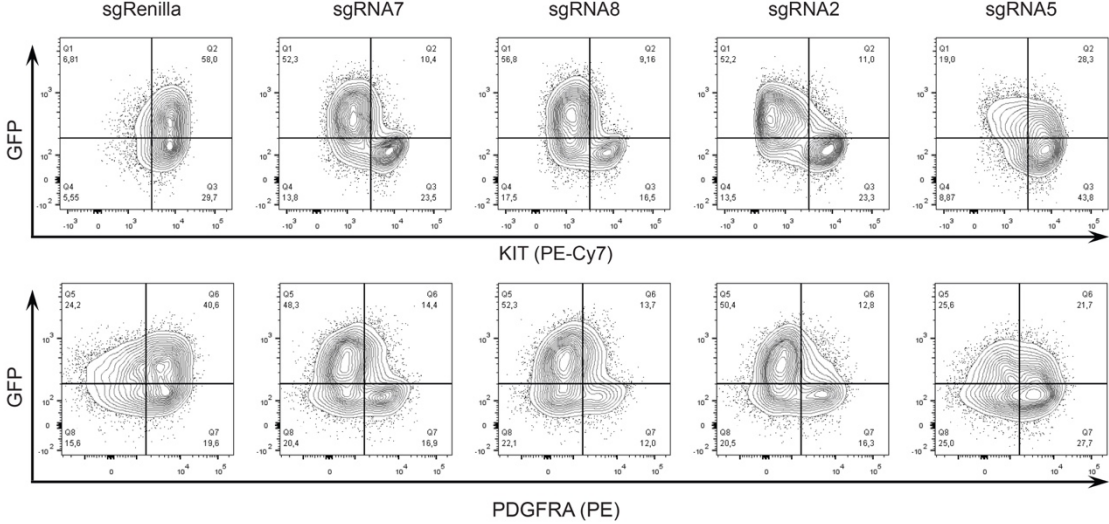

C

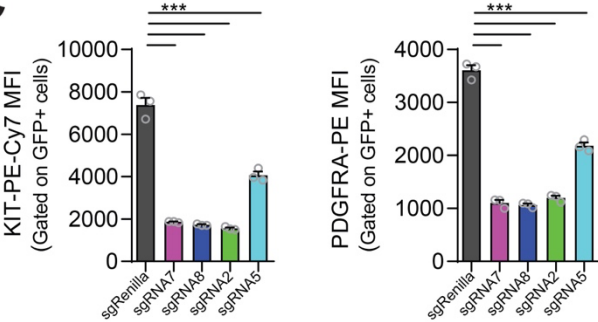

**Figure S2. SEKIT inactivation inhibits KIT and PDGFRA protein expression**

**A)** Quantification in Fragments per kilobase per million mapped reads (FPKM) of *KIT* and *PDGFRA* expressions in M07e cells expressing control sgRNA against GFP (brown bar) or sgRNA7 targeting SEKIT (green bar) as assessed by RNA-seq.

**B)** Representative flow cytometry analyses showing KIT (higher panel) and PDGFRA (lower panel) protein expression at cell surface in M07e cells following CRISPRi targeting of SEKIT locus with indicated sgRNAs compared to control sgRenilla.

**C)** Quantification of KIT and PDGFRA protein expression shown as mean fluorescent intensities of PE-Cy7 and PE respectively gated on transduced GFP<sup>+</sup> cells. Mean  $\pm$  SEM, n=3, significance is determined using Student's *t*-test, \*\*\*  $p < 0.001$ .

Figure S3

A

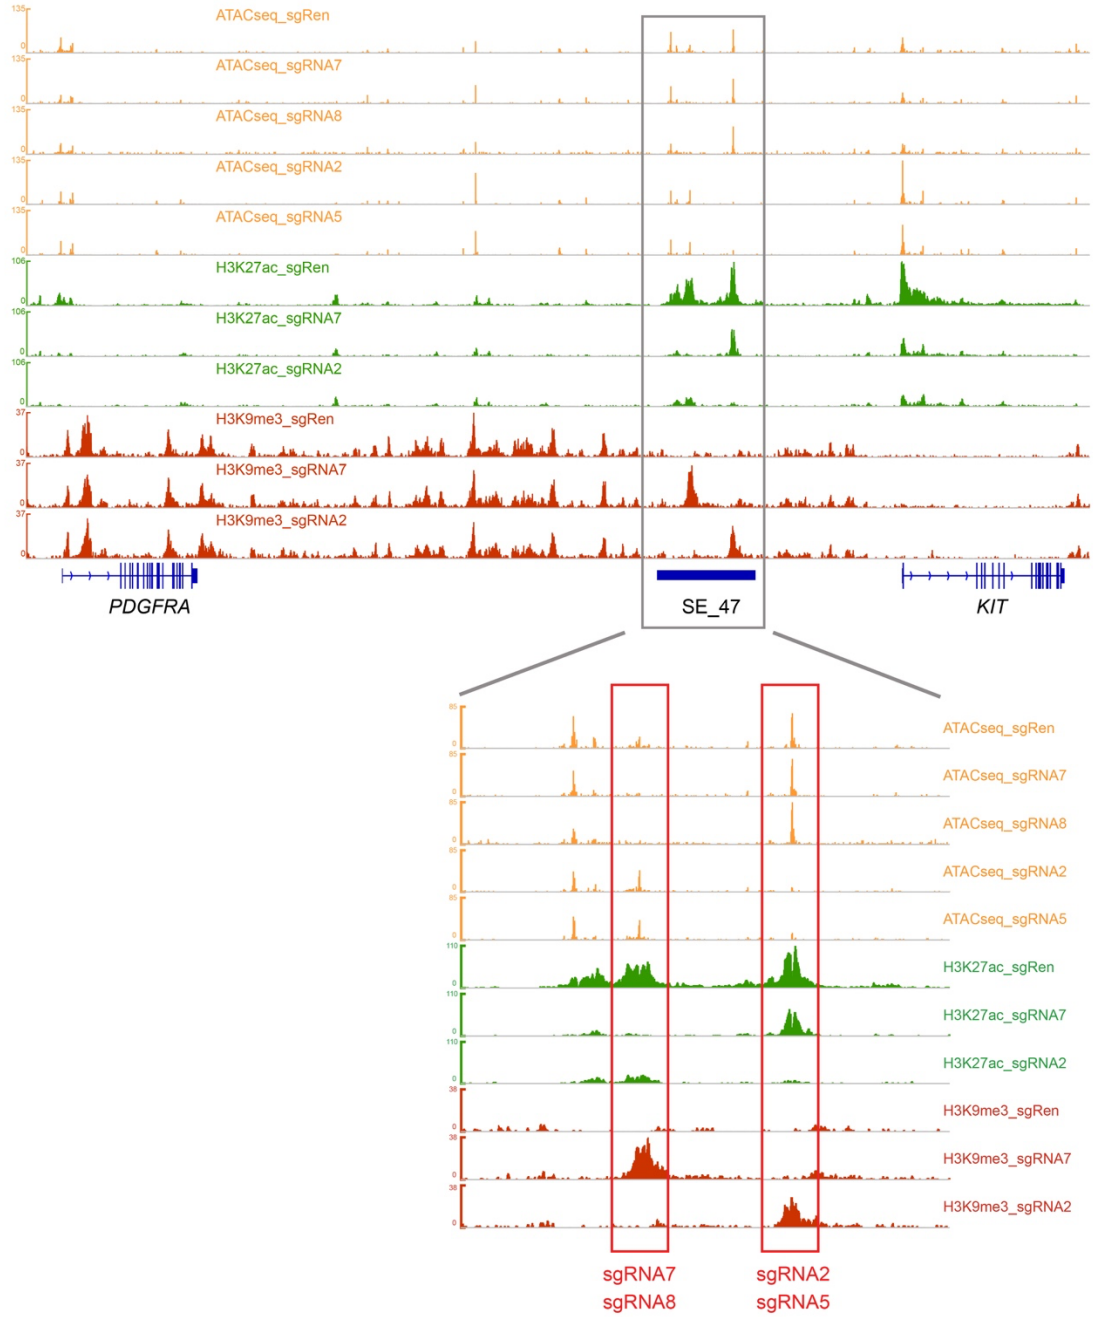

B

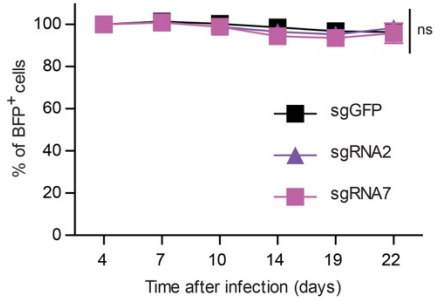

C

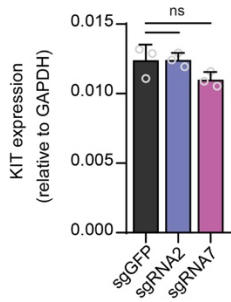

**Figure S3. CRISPRi targeting of SE is on target**

**A)** Gene track showing normalized read density histograms of ATAC-seq (orange tracks), H3K27ac ChIP-seq (green tracks) and H3K9me3 ChIP-seq (bordeaux tracks) following CRISPRi targeting of SE\_47 with indicated sgRNAs compared to control sgRenilla in M07e cells. Lower panel displays a blow up of grey box highlighted SE\_47 region. Targeted regions and location of sgRNAs are highlighted by red boxes.

**B)** Percentage of BFP<sup>+</sup> HEL 5J20 cells following CRISPRi targeting of SE\_47 locus with indicated sgRNAs compared to control sgGFP and normalized to day 4 after infection. Mean  $\pm$  SEM, n=3, statistical significance is determined using Student's *t*-test, ns=not significant.

**C)** Quantitative PCR showing *KIT* expression in HEL 5J20 cells following CRISPRi targeting of SE\_47 locus with indicated sgRNAs compared to control sgGFP. Mean  $\pm$  SEM, n=3, statistical significance is determined using Student's *t*-test, ns=not significant.

Figure S4

A

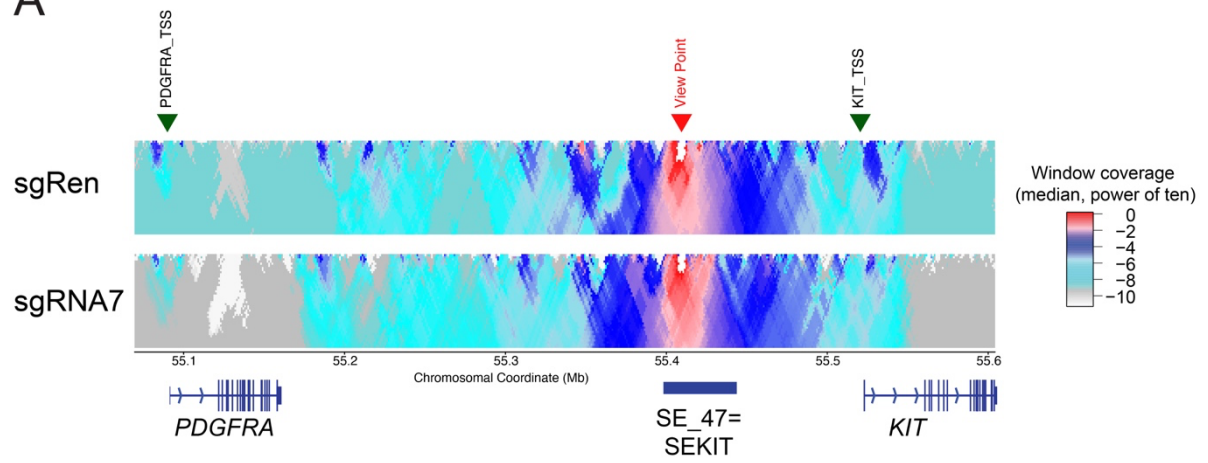



**Figure S4. SEKIT activity is required for its interaction with *KIT* and *PDGFRA* promoters**

**A)** 4C-seq domainograms with viewpoint on SEKIT (red arrowhead) showing cis-contacts between the SEKIT locus and proximal elements in M07e cells expressing non targeting CRISPRi (sgRen, top panel) or CRISPRi targeting SEKIT (sgRNA7, bottom panel). *PDGFRA* and *KIT* transcription start sites are shown with green arrowheads, and *PDGFRA*, SEKIT and *KIT* locations are shown below.

**Figure S5**

**A**

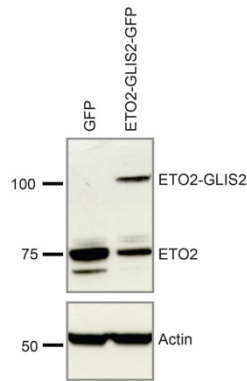

**B**

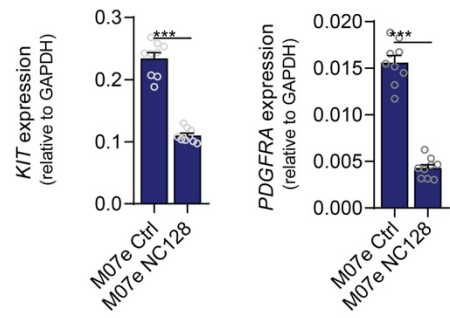

**C**

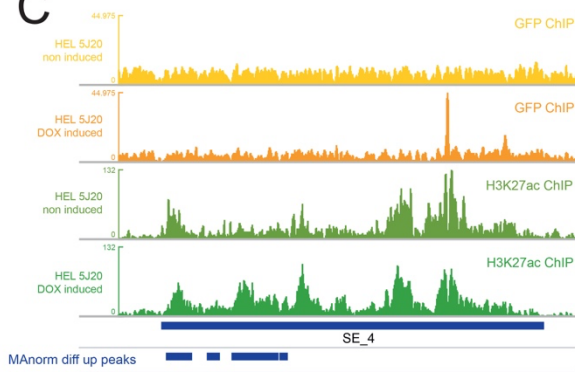

**D**

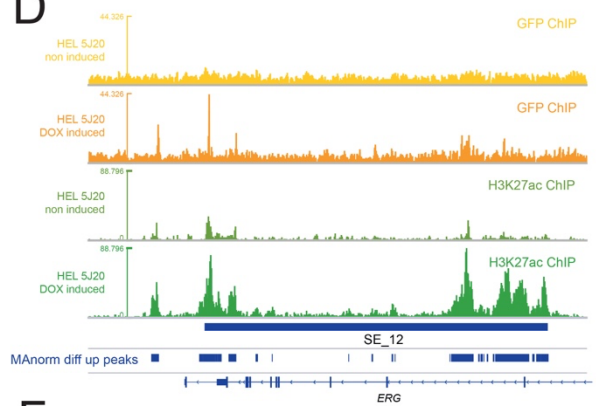

**E**

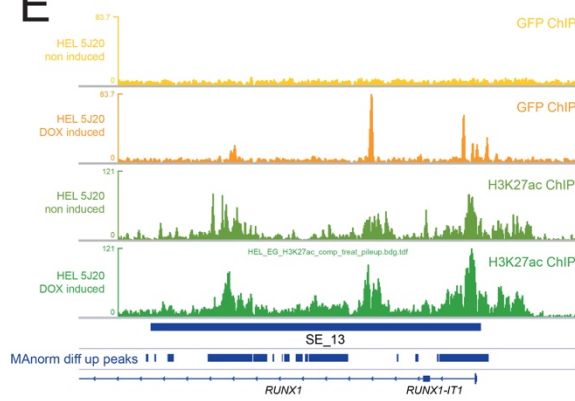

**F**

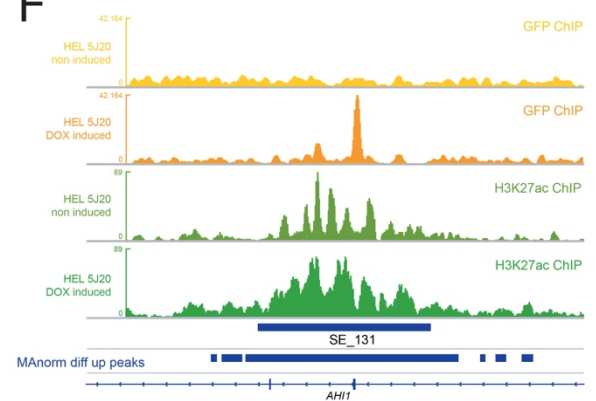

**Figure S5. SEKIT is induced by ETO2-GLIS2**

**A)** Western blot showing ETO2 and ETO2-GLIS2 expression in an individual clone of HEL 5J20 cells upon doxycycline induction of ETO2-GLIS2 expression compared to empty vector (GFP).

**B)** qPCR showing *KIT* and *PDGFRA* expression in M07e cells expressing NC128 or control peptides. Mean  $\pm$  SEM, n=3, statistical significance is determined using Student's *t*-test, \*\*\* p<0.001

**C-F** Gene tracks showing normalized read density histograms of H3K27Ac CHIP-seq analysis at **C)** SE\_4, **D)** SE\_12, **E)** SE\_13 and **F)** SE\_131 loci upon ETO2-GLIS2 (EG) expression induction in HEL 5J20 cells compared to non-induced cells (khaki and green tracks respectively) and read densities of GFP CHIP-seq in non-induced versus doxycycline induced HEL 5J20 cells (yellow and orange tracks respectively) showing EG binding in SEKIT locus. Read densities are shown as unique reads per million. Differentially upregulated peaks as determined using MAnorm algorithm are shown at the bottom.

Figure S6

A

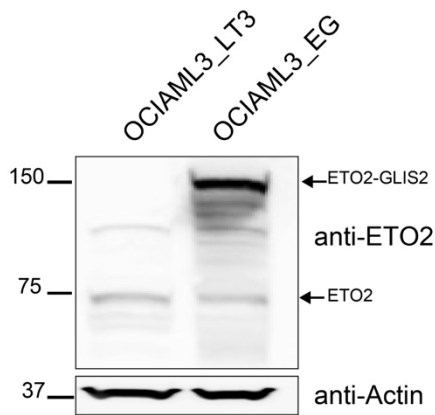

B

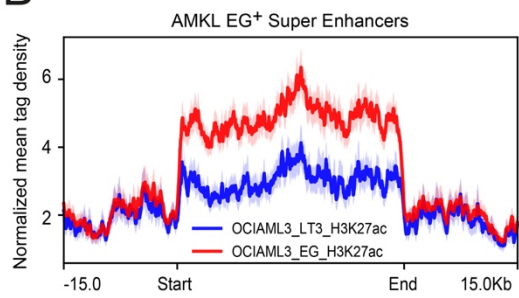

OCIAML3\_LT3\_H3K27ac    OCIAML3\_EG\_H3K27ac

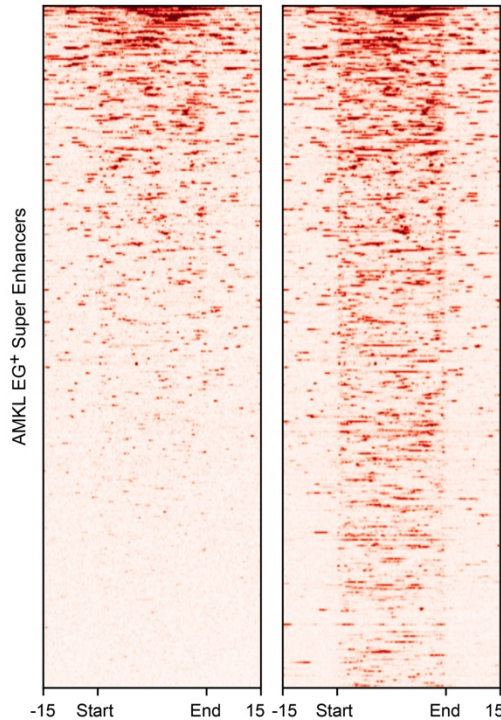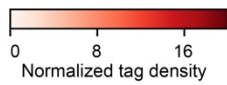

C

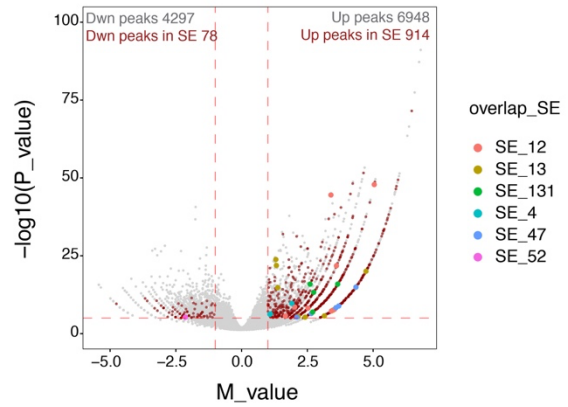

D

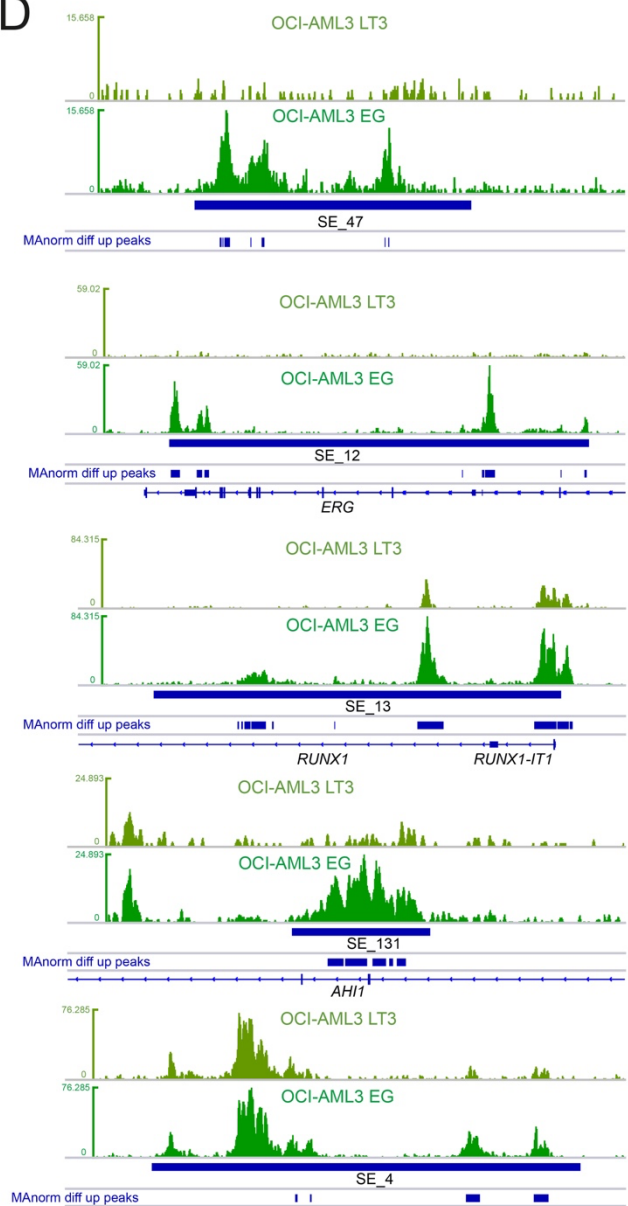

**Figure S6. Inducible ETO2-GLIS2 expression in OCI-AML3 cells induces AMKL specific SE activation**

**A)** Western blot showing ETO2-GLIS2 expression in OCI-AML3 cells transduced with empty vector (OCI-AML3\_LT3) or doxycycline-inducible ETO2-GLIS2 expressing vector (OCI-AML3\_EG) upon doxycycline induction.

**B)** Profile plot of normalized mean tag density (top panel) and Heatmap of normalized tag density (bottom panel) of H3K27ac ChIP-seq in OCI-AML3 cells stably transduced with empty vector (OCI-AML3\_LT3) or doxycycline-inducible ETO2-GLIS2 expressing vector (OCI-AML3\_EG) after doxycycline treatment at 448 Super Enhancer regions defined in ETO2-GLIS2 AMKL cells.

**C)** Volcano plot showing M value against  $-\log_{10}(\text{P-value})$  of H3K27ac peaks upon differential analysis using MAnorm. Peaks overlapping Super Enhancer regions defined in ETO2-GLIS2 AMKL cells are highlighted in claret and peaks overlapping top hit SE from CRISPRi screen are highlighted in colors.

**D)** Gene tracks showing normalized read density histograms of H3K27ac ChIP-seq analysis at top hit SE from CRISPRi screen loci upon doxycycline treatment of OCI-AML3 cells stably transduced with empty vector (OCI-AML3\_LT3) or doxycycline-inducible ETO2-GLIS2 expressing vector (OCI-AML3\_EG) (khaki and green tracks respectively). Read densities are shown as unique reads per million. Differentially upregulated peaks as determined using MAnorm algorithm are shown at the bottom.

**Figure S7**

**A**

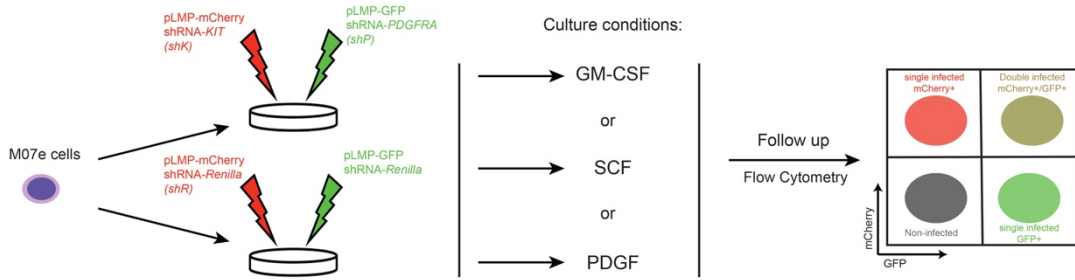

**B**

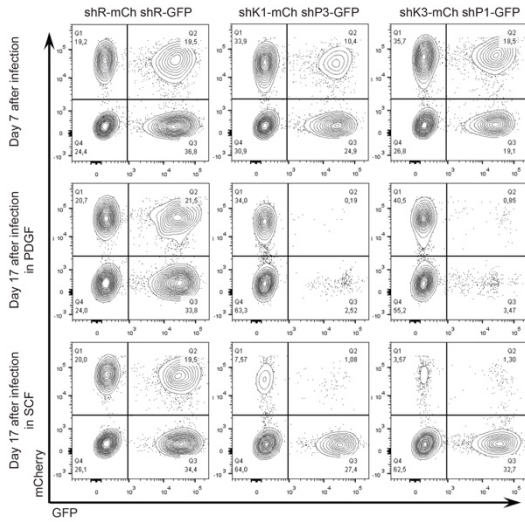

**C**

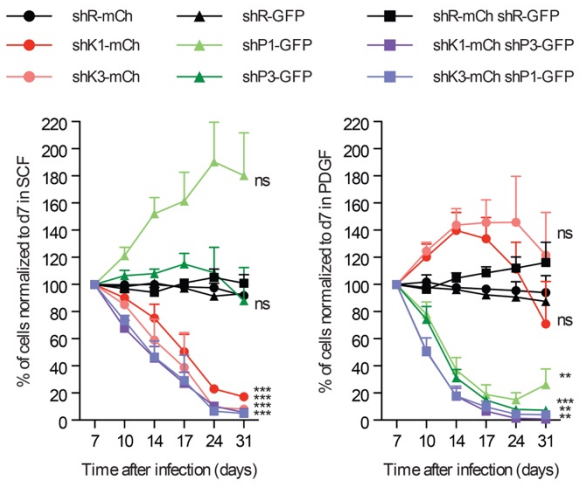

**D**

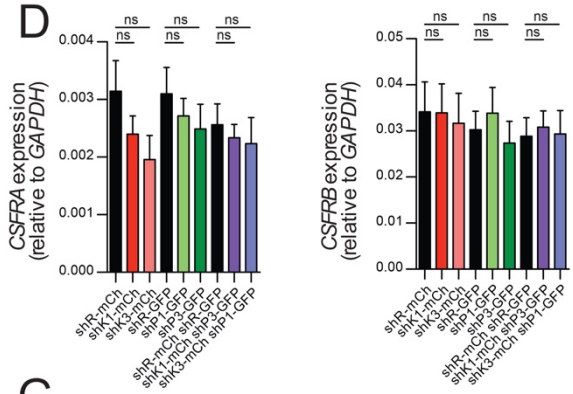

**E**

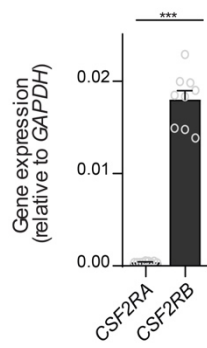

**F**

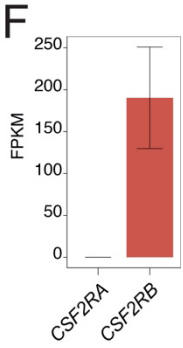

**G**

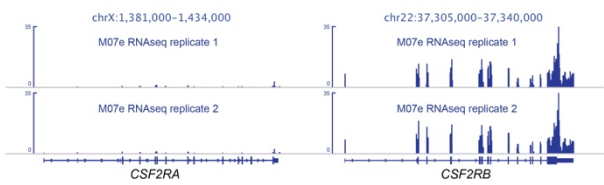

**Figure S7. shRNA targeting of *KIT* and *PDGFRA* is on target**

**A-C**, Two independent shRNAs targeting either *KIT* (shK) or *PDGFRA* (shP) were expressed in M07e cells separately or in combination. shK are expressed with mCherry (mCh) in cells while shP are expressed with GFP. Corresponding shRNAs targeting Renilla (shR) were used as control. 7 days after transduction, cells were washed and maintained in the presence of PDGF-AA or SCF as indicated.

**A)** Schematic depicting experimental design.

**B)** Representative flow cytometry analyses of shRNA expressing cells at day 7 and day 17 after infection.

**C)** Percentage of M07e cells expressing indicated shRNAs normalized to day 7 after infection. Mean  $\pm$  SEM, n=3, significance is determined using Student's *t*-test, statistical significance is determined using Student's *t*-test, \* p<0.05, \*\* p<0.01, \*\*\* p<0.001, ns=not significant.

**D)** Quantitative PCR showing *CSF2RA* and *CSF2RB* expression at day 4 after infection. Mean  $\pm$  SEM, n=3, significance is determined using Student's *t*-test, statistical significance is determined using Student's *t*-test, ns=not significant.

**E)** Quantitative PCR comparing *CSF2RA* and *CSF2RB* expression in M07e cells. Mean  $\pm$  SEM, n=3, significance is determined using Student's *t*-test, \*\*\*p < 0.001

**F)** Quantification in Fragments per kilobase per million mapped reads (FPKM) of *CSFR2A* and *CSFR2B* expressions in M07e cells as assessed by RNA-seq.

**G)** Gene tracks showing normalized read density histograms at *CSF2RA* and *CSF2RB* genes in two replicates of M07e cells RNA-seq.

Figure S8

A

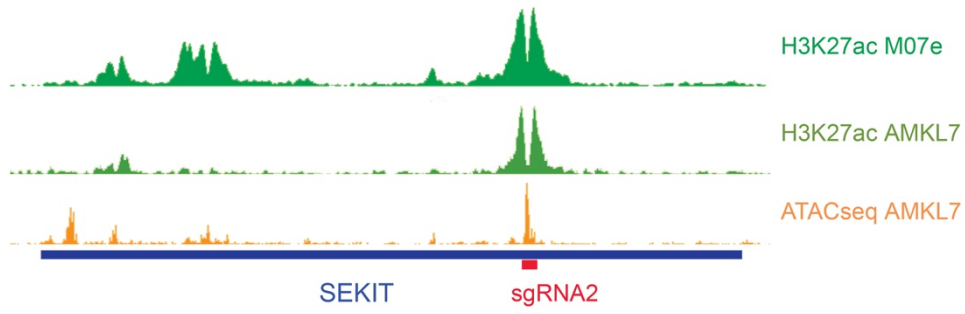

B

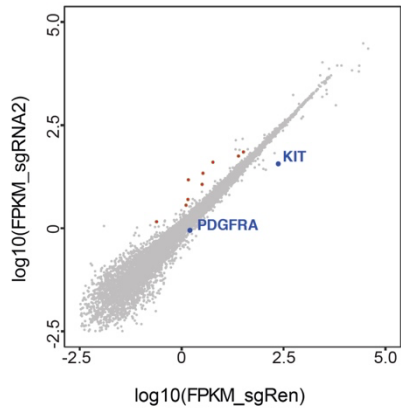

C

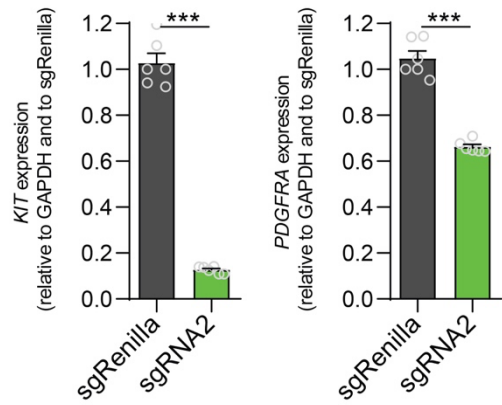

D

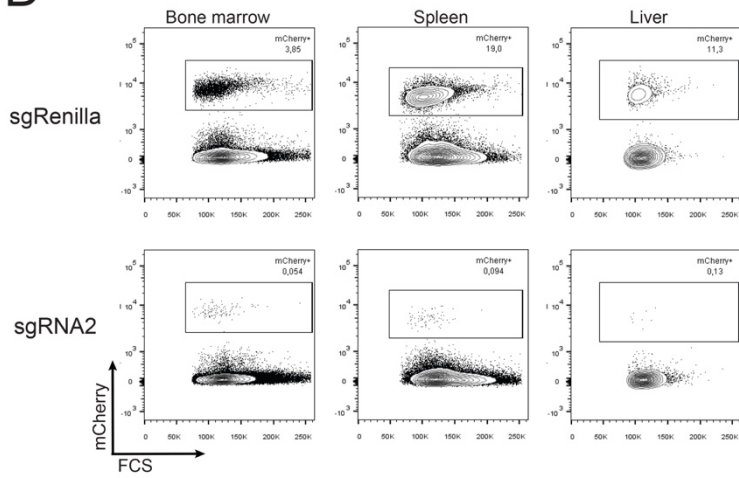

E

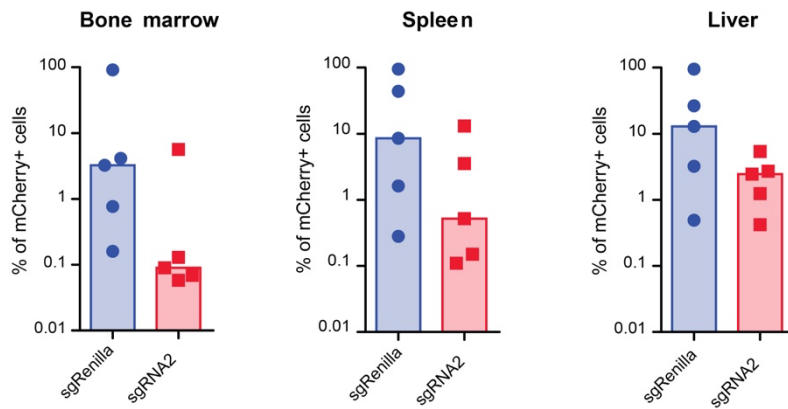



**Figure S8. Inhibition of SEKIT impairs AMKL progression *in vivo***

**A)** Gene track showing normalized read density histograms of H3K27ac ChIP-seq and ATAC-seq (bottom panel) in AMKL7 patient cells (kaki and orange respectively) and H3K27ac ChIP-seq in M07e cells (green) at SEKIT locus. Read densities are shown as unique reads per million. Location of sgRNA2 is shown in red.

**B)** Scatter plot showing genes whose expression is significantly altered following CRISPRi targeting of SEKIT with sgRNA2 compared to control sgRenilla in AMKL7 patient cells. Dots represent average of  $\log_{10}$ FPKM across the 2 replicates. Green dots  $p < 0.05$ , red dots  $p < 0.05$  and  $> 2$ -fold change. Statistical significance is determined using Student's *t*-test. *KIT* and *PDGFRA* genes are highlighted.

**C)** qPCR showing *KIT* and *PDGFRA* expression following CRISPRi targeting of SE\_KIT with sgRNA2 compared to control sgRenilla in AMKL7 patient cells. Mean  $\pm$  SEM,  $n=6$ , Student's *t*-test,  $***p < 0.001$ .

**D)** Representative flow cytometry analyses of sgRNA2- or sgRenilla-transduced AMKL7<sup>Luc</sup>mCherry<sup>+</sup> cells in the bone marrow, spleen and liver of xenografted mice.

**E)** Quantification of mCherry<sup>+</sup> cells as analyzed in panel a. Mean  $\pm$  SEM,  $n=5$ .

**Figure S9**

**A**

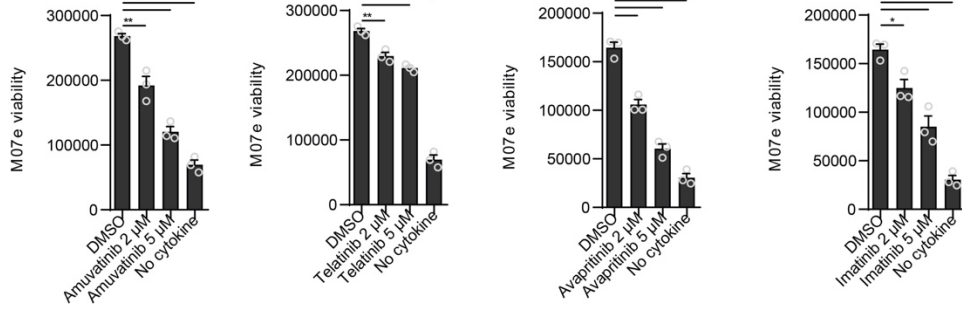

**B**

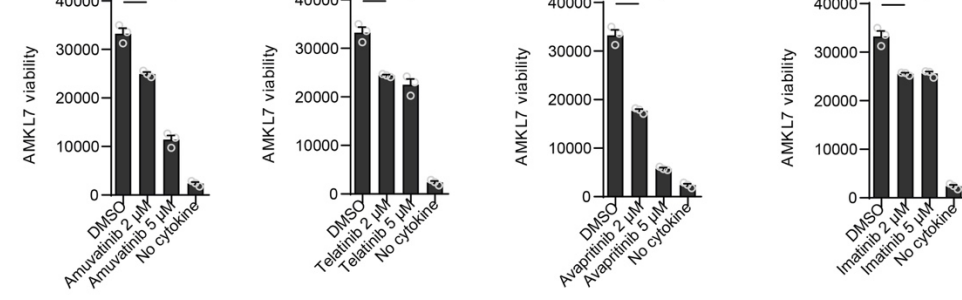

**C**

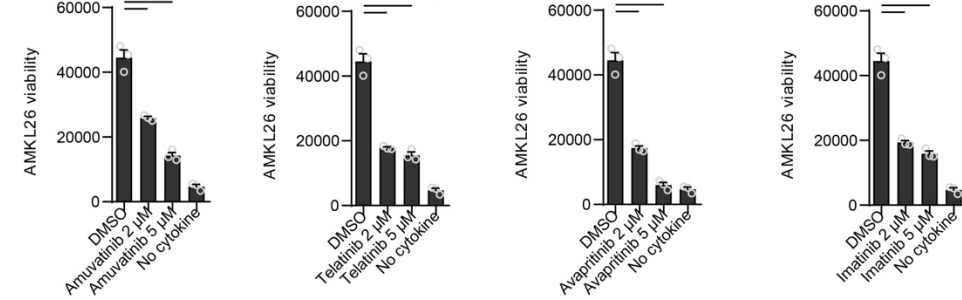

**D**

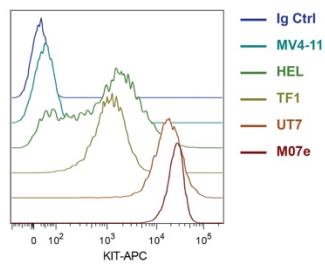

**E**

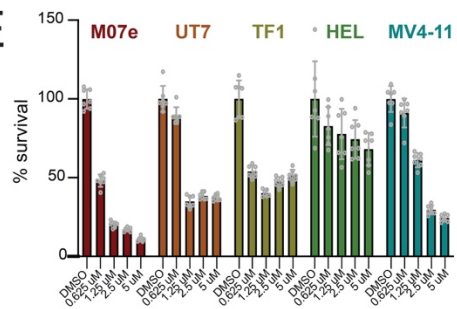

**F**

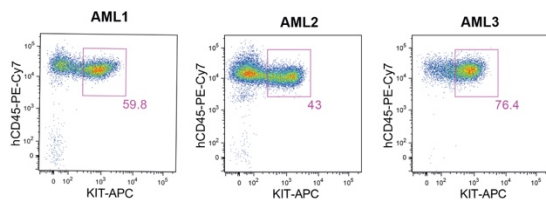

**G**

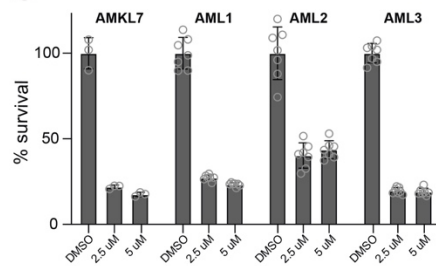

**Figure S9. Tyrosine kinase inhibitors affect AMKL cell growth**

**A-C**, Viability of M07e cells (**A**), AMKL7 (**B**) and AMKL26 (**C**) patient cells after 96h treatment with indicated kinase inhibitors or vehicle (DMSO). Negative control of culture without cytokines (No cytokine) is shown. Mean  $\pm$  SEM, n=3, \*\*\*p<0.001, \*p<0.05, \*\*p<0.01, and \*\*\*p<0.001.

**D**) Histogram of flow cytometry analysis showing KIT expression in depicted AML cell lines.

**E**) Viability of AML cell lines after 96h treatment with indicated concentrations of Axitinib or vehicle (DMSO). Mean  $\pm$  SEM, n=7.

**F**) Flow cytometry analysis for KIT and CD45 expression on AML blasts isolated from PDX mice.

**G**) Viability of AMKL7 and three AML patient cells derived from PDX mice after 96h treatment with indicated concentrations of Axitinib or vehicle (DMSO). Mean  $\pm$  SEM, n=3 for AMKL7 and n=7 for AML1-3.

## Supplementary Tables

**Table S1: sgRNA composition and normalized counts of CRISPRi screen replicates**

Related to Figure 1

See excel file "Table\_S1.xlsx"

**Table S2: Cell counts of FISH experiments**

Related to Figure 2

| Cell type: | <i>KIT</i> -SEKIT <<br><i>KIT</i> -control |      | <i>KIT</i> -SEKIT ><br><i>KIT</i> -control |      | <i>KIT</i> -SEKIT =<br><i>KIT</i> -control |    | Sample size<br>(chromosomes) |
|------------|--------------------------------------------|------|--------------------------------------------|------|--------------------------------------------|----|------------------------------|
|            | number                                     | %    | number                                     | %    | number                                     | %  |                              |
| M07e       | 139                                        | 69.5 | 27                                         | 13.5 | 34                                         | 17 | 200                          |
| HEL        | 65                                         | 43.3 | 46                                         | 30.7 | 39                                         | 26 | 150                          |

### Chi2 test

| M07e vs expected: |      |      |      |      |     | Chi2 value: | p-value:    |
|-------------------|------|------|------|------|-----|-------------|-------------|
| Observed          | 139  | 83.7 | 27   | 16.3 | 166 |             |             |
| Expected          | 83   | 50   | 83   | 50   | 166 |             |             |
| HEL vs expected:  |      |      |      |      |     | 3.25        | 0.71 ns     |
| Observed          | 65   | 58.6 | 46   | 41.4 | 111 |             |             |
| Expected          | 55.5 | 50   | 55.5 | 50   | 111 |             |             |
| M07e vs HEL:      |      |      |      |      |     | 21.72       | <0.00001*** |
| M07e              | 139  | 83.7 | 27   | 16.3 | 166 |             |             |
| HEL               | 65   | 58.6 | 46   | 41.4 | 111 |             |             |

**Table S3: Genesets negatively correlated with CRISPRi inhibition of SEKIT**

Related to Figure 5

| GENESET_NAME                                       | SIZE | ES          | NES        | NOM_p-val   | FDR_q-val  |
|----------------------------------------------------|------|-------------|------------|-------------|------------|
| KEGG_CYTOKINE_CYTOKINE_RECEPTOR_INTERACTION        | 80   | -0.5101066  | -1.858465  | 0.006024096 | 0.15128882 |
| GO_CYTOKINE_BINDING                                | 45   | -0.5284298  | -1.7387868 | 0.019543974 | 0.18277322 |
| AP1_Q4                                             | 156  | -0.4322358  | -1.7331688 | 0.002853067 | 0.18397884 |
| GO_PLATELET_DERIVED_GROWTH_FACTOR_RECEPTOR_BINDING | 9    | -0.7660931  | -1.6965766 | 0.02097902  | 0.18942948 |
| REACTOME_SIGNALING_BY_PDGF                         | 81   | -0.46986297 | -1.6964734 | 0.016897082 | 0.18859418 |
| AP1_Q6                                             | 139  | -0.43164703 | -1.6909294 | 0.007587254 | 0.18844871 |
| GO_CYTOKINE_ACTIVITY                               | 51   | -0.48939356 | -1.6587768 | 0.02724359  | 0.18603332 |
| TGANTCA_AP1_C                                      | 554  | -0.35058564 | -1.5819211 | 0.0001      | 0.20607616 |
| REACTOME_SIGNALING_BY_SCF_KIT                      | 68   | -0.4470207  | -1.5715805 | 0.042944785 | 0.20909369 |
| PDGF_UP.V1_DN                                      | 44   | -0.47405526 | -1.5650235 | 0.04715447  | 0.21040736 |
| AP1_Q1                                             | 138  | -0.4016879  | -1.5597069 | 0.017595308 | 0.21429409 |
| GO_CYTOKINE_RECEPTOR_BINDING                       | 114  | -0.4026892  | -1.5483524 | 0.016467066 | 0.21501972 |
| REACTOME_PIP3_ACTIVATES_AKT_SIGNALING              | 25   | -0.53417414 | -1.5436361 | 0.042016808 | 0.21708472 |
| REACTOME_PI3K_AKT_ACTIVATION                       | 32   | -0.502016   | -1.5235479 | 0.0461285   | 0.22794746 |
| AP1_Q2                                             | 143  | -0.3835286  | -1.5055175 | 0.023988007 | 0.2345746  |
| AP1_Q2_Q1                                          | 143  | -0.3823649  | -1.502686  | 0.021770682 | 0.23683275 |
| AP1_Q6_Q1                                          | 141  | -0.3752396  | -1.4760147 | 0.023809524 | 0.25127    |
| GO_CYTOKINE_RECEPTOR_ACTIVITY                      | 36   | -0.45751223 | -1.4679023 | 0.044701986 | 0.25599676 |
| AP1_C                                              | 138  | -0.3734915  | -1.4593756 | 0.038402457 | 0.26026753 |
| REACTOME_REGULATION_OF_KIT_SIGNALING               | 13   | -0.56535697 | -1.4172556 | 0.10175438  | 0.2858632  |
| PID_KIT_PATHWAY                                    | 45   | -0.41782665 | -1.3744195 | 0.080314964 | 0.31436348 |

**Table S4: sequences of sgRNA used in single CRISPRi experiments**

Related to Figures 1, 2 and 7

| sgRNA ID  | 20nt-sgRNA guide         | 73mer sgRNA PCR oligos for cloning in pU6-sgRNA-EF1Alpha-puro-T2A-BFP using XhoI and BstXI | 24mer annealing oligos for cloning in pLV-hU6-sgRNA-hUbc-dCas9-KRAB-T2a-GFP using BsmBI |                              |
|-----------|--------------------------|--------------------------------------------------------------------------------------------|-----------------------------------------------------------------------------------------|------------------------------|
| sgRNA2    | CAGATAATAGAC<br>TGTCATG  | GGAGAACCACCTTGTGGCAGATAATAGACTGGTCATGGTTTTAGAG<br>CTAGAAATAGCAAGTAAAATAAGGC                | Forward                                                                                 | CACCCAGATAATAGACTG<br>GTCATG |
|           |                          |                                                                                            | Reverse                                                                                 | AAACCATGACCAGTCTATT<br>ATCTG |
| sgRNA5    | TCCGTATAGCAA<br>GTGTACCC | GGAGAACCACCTTGTGGTCCGTATAGCAAGTGTACCCGTTTTAGAG<br>CTAGAAATAGCAAGTAAAATAAGGC                | Forward                                                                                 | CACCTCCGTATAGCAAGTG<br>TACCC |
|           |                          |                                                                                            | Reverse                                                                                 | AAACGGGTACACTTGCTAT<br>ACGGA |
| sgRNA7    | AAGGGTCTTATC<br>TAACTACT | GGAGAACCACCTTGTGGAGGGTCTTATCTAACTACTGTTTTAGAG<br>CTAGAAATAGCAAGTAAAATAAGGC                 | Forward                                                                                 | CACCAAGGGTCTTATCTAA<br>CTACT |
|           |                          |                                                                                            | Reverse                                                                                 | AAACAGTAGTTAGATAAG<br>ACCCTT |
| sgRNA8    | AGGGCCTTCCGC<br>TAAAGGCA | GGAGAACCACCTTGTGGAGGGCCTTCCGCTAAAGGCAGTTTTAGA<br>GCTAGAAATAGCAAGTAAAATAAGGC                | Forward                                                                                 | CACCAGGGCCTTCCGCTAA<br>AGGCA |
|           |                          |                                                                                            | Reverse                                                                                 | AAACTGCCTTTAGCGGAA<br>GGCCCT |
| sgRenilla | GGAACACGGCC<br>GTATTAGGG | GGAGAACCACCTTGTGGGGAACACGGCCGTATTAGGGTTTTAGA<br>GCTAGAAATAGCAAGTAAAATAAGGC                 | Forward                                                                                 | CACCGGAACACGGCCGTA<br>TTAGGG |
|           |                          |                                                                                            | Reverse                                                                                 | AAACCCCTAATACGGCCGT<br>GTTCC |
| sgRNA3    | AGACCCTTGCC<br>TTAGCGGA  | GGAGAACCACCTTGTGGAGACCCTTGCCTTAGCGGAGTTTTAGAG<br>CTAGAAATAGCAAGTAAAATAAGGC                 |                                                                                         |                              |
| sgGFP     | GACCAGGATGG<br>GCACCACCC | GGAGAACCACCTTGTGGGACCAGGATGGGCACCACCCGTTTTAGA<br>GCTAGAAATAGCAAGTAAAATAAGGC                |                                                                                         |                              |

**Table S5: sequences of shRNA used in gene knock-down experiments**

Related to Figures 6 and S5

| Gene Symbol   | shRNA ID  | 22nt-shRNA guide           | mRNA target site           | 97mer oligo                                                                                            |
|---------------|-----------|----------------------------|----------------------------|--------------------------------------------------------------------------------------------------------|
| <i>KIT</i>    | shKIT1    | TTCTGCTCAGAC<br>ATCGTCGTGC | GCACGACGATGTCTGAGC<br>AGAA | TGCTGTTGACAGTGAGCGACACGACGATGCTGTGAGCAGAATAGTGAAGCCACAGATG<br>TATTCTGCTCAGACATCGTCGTGCTGCCTACTGCCTCGGA |
| <i>KIT</i>    | shKIT3    | TTATCTACTACT<br>TCCAAGGTTG | CAACCTTGAAGTAGTAG<br>ATAA  | TGCTGTTGACAGTGAGCGAAACCTTGAAGTAGTAGATAATAGTGAAGCCACAGATG<br>TATTATCTACTACTTCCAAGGTTGCTGCCTACTGCCTCGGA  |
| <i>PDGFRA</i> | shPDGFRA1 | TAAACATCAAC<br>CAAGTCTCC   | GGAGGACTTGGTTGATGT<br>TTAA | TGCTGTTGACAGTGAGCGAGAGGACTTGGTTGATGTTAATAGTGAAGCCACAGATGT<br>ATTAACATCAACCAAGTCTCCTCCTACTGCCTCGGA      |
| <i>PDGFRA</i> | shPDGFRA3 | ATACTGTGTAGT<br>ATCAGCCTGC | GCAGGCTGATACTACACA<br>GTAT | TGCTGTTGACAGTGAGCGACAGGCTGATACTACACAGTATTAGTGAAGCCACAGATGT<br>AATACTGTGTAGTATCAGCCTGCTGCCTACTGCCTCGGA  |

**Table S6: sequences of primers used in quantitative PCR experiments**

Related to Figures 2, 3, 6, S3, S4, S5 and S6

| Gene Symbol   | Primer ID   | Primer sequence         |
|---------------|-------------|-------------------------|
| <i>KIT</i>    | hKIT fwd    | CAATTCTGACGTCAATGCTGCCA |
|               | hKIT rev    | GAGCATGCCATTACGAGCC     |
| <i>PDGFRA</i> | hPDGFRA fwd | CCTGTCCCTGAGGAGGAGGAC   |
|               | hPDGFRA rev | GAAGGTGGAAGTCTGGAACCC   |
| <i>CSF2RA</i> | hCSF2RA fwd | TCCCGCCAGTTCCACAGATC    |
|               | hCSF2RA rev | GACCTCTTCGCGGTAGCCTT    |
| <i>CSF2RB</i> | hCSF2RB fwd | AACGGGATCTGGAGCGAGTG    |
|               | hCSF2RB rev | AGATCACGATGAGGGCCAGC    |
| <i>GAPDH</i>  | hGAPDH fwd  | CTTTTGCCTGCGCCAGCCGAG   |
|               | hGAPDH rev  | CCAGGCGCCAATACGACCA     |
